# Supplementary material for: Theoretical study on lithium storage performance of V-doped Ti2CO2 MXene
Source: Royal Society of Chemistry journal article supplement (doi:10.1039/d4ra03618b), 2024-01-01
Supplement: d4ra03618b1.pdf [file d4ra03618b1.pdf]

## Supporting Information

### Theoretical study on lithium storage performance of V-doped $\text{Ti}_2\text{CO}_2$ MXene

Li Wang<sup>a</sup>, Wenqi Liu<sup>b</sup>, Fan Bai<sup>c</sup>, Xichen Zheng<sup>a</sup>, Chaofan Yin<sup>a</sup>, Jiawei Wei<sup>a</sup>,

Juanjuan Ma<sup>a</sup>, Hongyu Bai<sup>c</sup>, Binbin Dong<sup>a\*</sup>

- a. Henan Key Laboratory of Green Building Materials Manufacturing and Intelligent Equipment, Luoyang Institute of Science and Technology, Luoyang, Henan, 471023, PR China.
- b. Jinan Central Business District Investment and Construction Group Co., Ltd., Jinan, Shandong, 250013, PR China.
- c. Yanshi Zhongyue Refractory Co. LTD, Luoyang 471900, PR China.

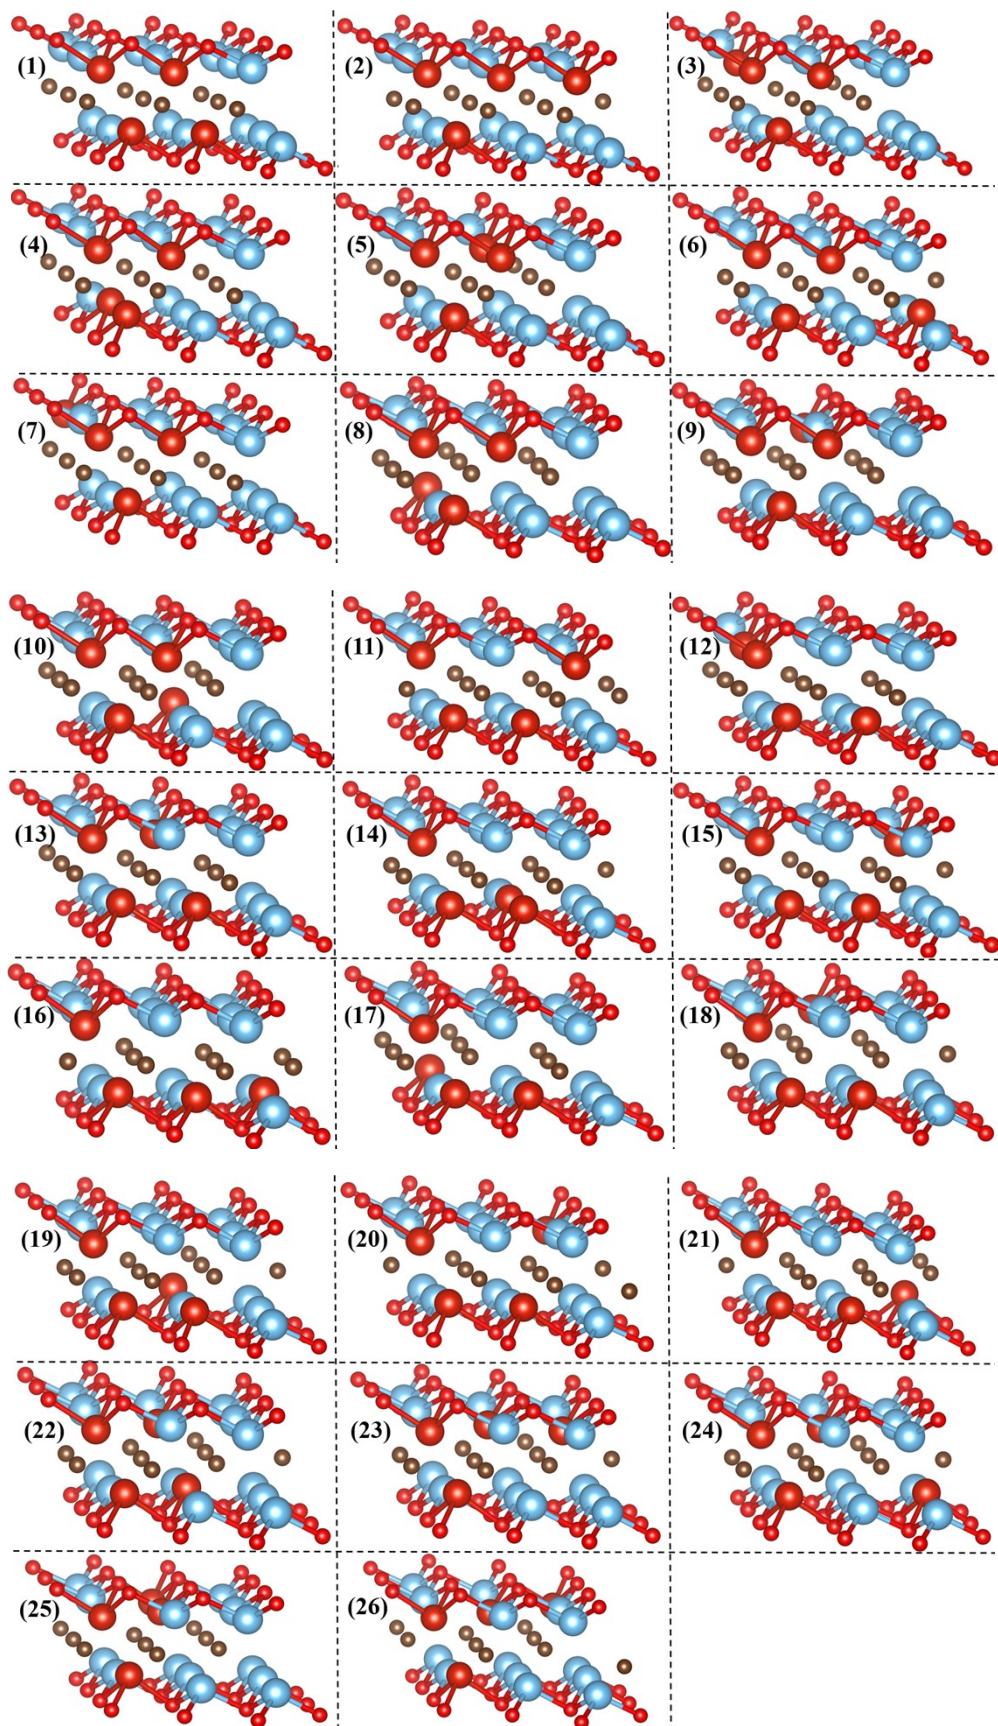

Fig. S1 26 predicted structures of TiVCO<sub>2</sub>

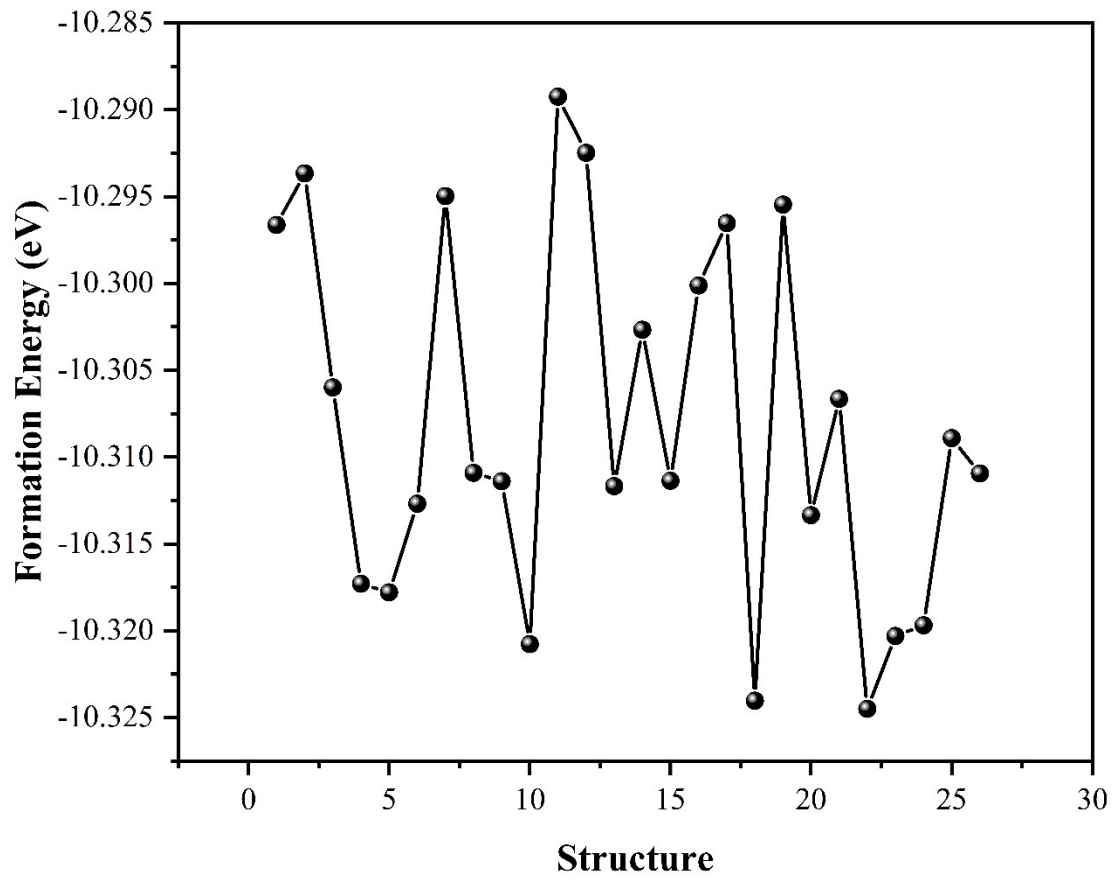

Fig. S2 Formation energy of different predicted structures

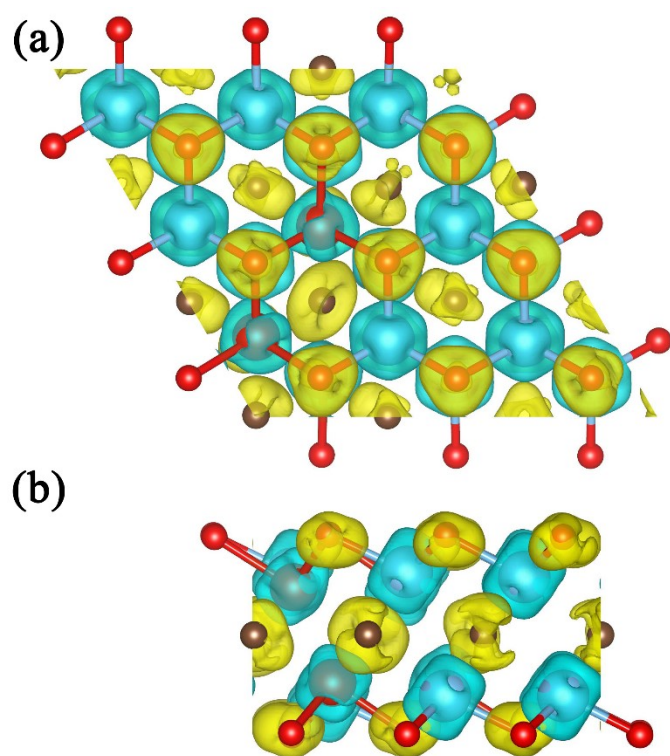

Fig. S3 Top (a) and side (a) view of TiVCO<sub>2</sub> charge density difference.
